# Supplementary material
Source: MDPI journal article supplement (https://www.mdpi.com/2673-9992/14/1/95)
Supplement: s1 [file s1]

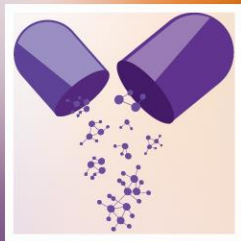

# The 8th International Electronic Conference on Medicinal Chemistry (ECMC 2022)

01-30 NOVEMBER 2022 | ONLINE

## Development and Evaluation of AT11-guided Liposomes for Human Papilloma Virus cancer

Chaired by **DR. ALFREDO BERZAL-HERRANZ**;  
Co-Chaired by **PROF. DR. MARIA EMÍLIA SOUSA**

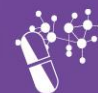

pharmaceuticals

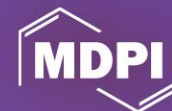

**Jéssica Lopes-Nunes<sup>1</sup>, Paula A. Oliveira<sup>2</sup>, and Carla Cruz<sup>1\*</sup>**

<sup>1</sup> CICS-UBI Centro de Investigação em Ciências da Saúde, Universidade da Beira Interior, Av. Infante D. Henrique, 6200-506 Covilhã, Portugal;

<sup>2</sup> Centro de Investigação e Tecnologias Agroambientais e Biológicas (CITAB), Inov4Agro, Universidade de Trás os Montes e Alto Douro (UTAD), Quinta de Prados, 5000-801 Vila Real, Portugal

\* Corresponding author: [carlacruz@fcsaude.ubi.pt](mailto:carlacruz@fcsaude.ubi.pt)

# Development of AT11-guided Liposomes for Human Papilloma Virus

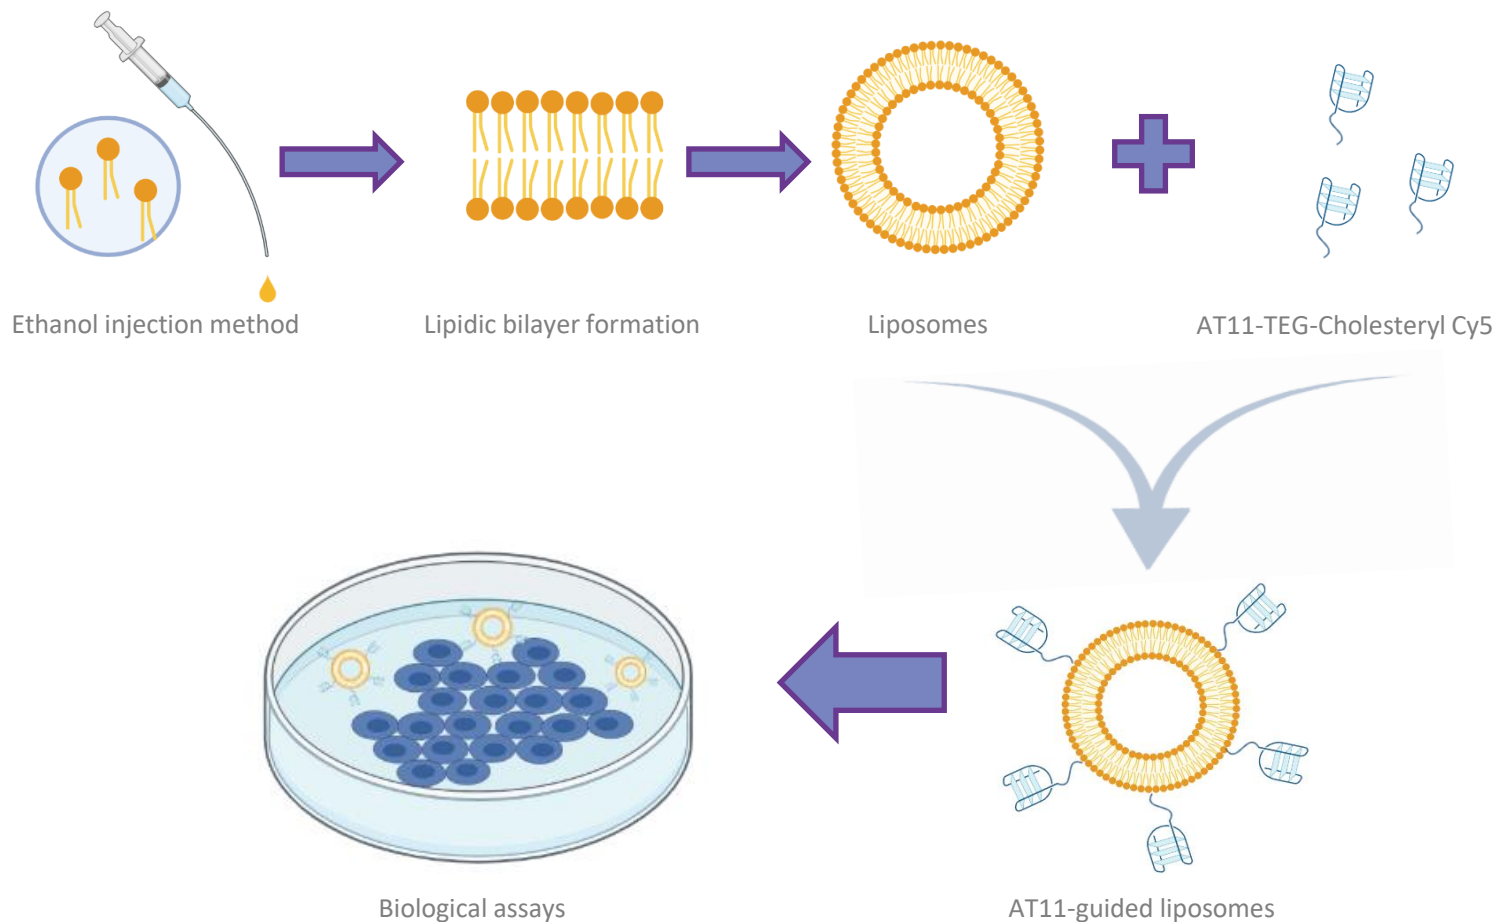

ECMC  
2022

The 8th International Electronic  
Conference on Medicinal Chemistry  
01-30 NOVEMBER 2022 | ONLINE

Conventional anticancer therapies present low specificity, leading to several secondary effects. To improve these drawbacks, aptamers able to fold into G-quadruplex (G4) are being used to promote drug accumulation in cancer cells. AS1411 is a G4 aptamer able to recognize nucleolin, a protein overexpressed in cancer cells' surface. This aptamer was tested in phase II clinical trials but showed low response rates and suboptimal pharmacokinetics. Nevertheless, AS1411 is being used as targeting agent. Moreover, AS1411 derivatives were developed, with improved toxicity and high affinity to nucleolin. Thus, we propose to use AT11, an AS1411 derivative, to functionalize liposomes and improve the selectivity of C8 (a potential anticancer drug) into oral cancer. Therefore, we produced liposomes (blank or C8-associated) by ethanol injection method to, then, functionalize with AT11-TEG-Cholesteryl. The resulting liposomes were characterized by DLS. C8 association was determined by UV/vis spectroscopy and the AT11 functionalization was determined by SDS-PAGE. The effect of blank and C8-associated liposomes on oral cancer and healthy cells' viability was determined by MTT and its internalization of was visualized by confocal microscopy. Liposomes with hydrodynamic diameters of 148-168 nm were obtained and C8 was efficiently associated (~100%). When the cells were treated with blank liposomes, cell viability was almost unaffected. After treating with C8-associated liposomes, both cell lines showed a dose-response effect. Additionally, we observed that AT11-liposomes can internalize and reach the cytoplasm of cells. Overall, these findings suggest that the tested liposomes are promising drug carriers for oral cancer therapy.

**Keywords:** Aptamer; liposomes; oral cancer.

ECMC  
2022

The 8th International Electronic  
Conference on Medicinal Chemistry  
01-30 NOVEMBER 2022 | ONLINE

Head and neck squamous cell carcinomas (HNSCC) has been a steady rise.

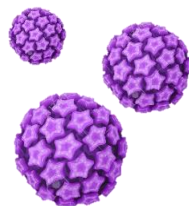

HPV16 is the predominant HPV type responsible for this disease

Standard Care for HNSCC patients

- Surgery;
- Chemotherapy;
- Radiotherapy.

Adverse effects on life quality and mortality are associated with these treatments

*Yete, et al. Oncology (doi:10.1159/000485322)*

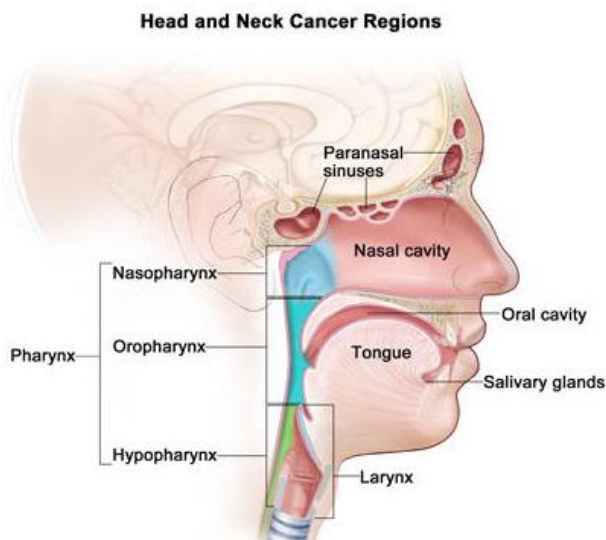

Improving treatment options for HNSCC patients infected with HPV16 is a priority

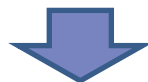

No effective treatment for HPV infection

ECMC  
2022

The 8th International Electronic  
Conference on Medicinal Chemistry  
01-30 NOVEMBER 2022 | ONLINE



## Acridine orange derivative (C<sub>8</sub>)

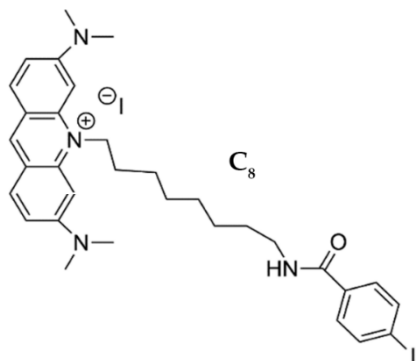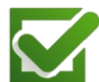

G4-ligand able to stabilize G-rich regions present in the HPV genome

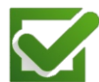

Potential anticancer effect

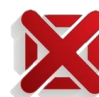

High non-specific toxicity

*Carvalho et al., Biochimie (doi:10.1016/j.biochi.2017.11.004)*

## Imiquimod (IQ)

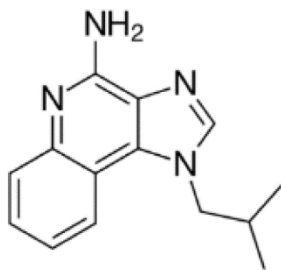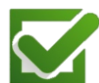

Boost the adaptative immune response, inducing high levels of IFN and TNF-alfa

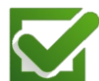

Induces apoptosis of tumor cells through caspase activation



Effective in lesions caused by low-risk HPV, but it has been suggested that it may also have anticancer effects in malignant cells resulting from high-grade

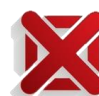

HPV infections

Uncommonly systemic side effects

*Yuan et al., Hum Vaccin Immunother. (doi:10.1080/21645515.2018.1445947)*

ECMC  
2022

The 8th International Electronic  
Conference on Medicinal Chemistry  
01-30 NOVEMBER 2022 | ONLINE

## Aptamers

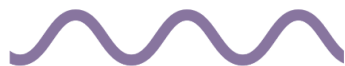

Single-stranded oligonucleotides

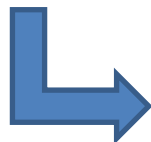

Suitable drug-carriers to achieve an effective drug delivery

## Targets

- Proteins
- Small molecules
- Ions
- Whole cells

Recognize and  
bind specifically

### G4 Aptamers

#### Benefits comparatively to monoclonal antibodies:

- ✓ Do not stimulate an immune response;
- ✓ Higher stability;
- ✓ Easier to manufacture and store;
- ✓ Smaller size;
- ✓ Cheaper.

G4 structures have a higher negative charge density than duplex DNA, which favors their interaction with cationic proteins or small molecules

Alshaer et al., Adv. Drug Deliv. Rev. (doi: [10.1016/j.addr.2018.09.011](https://doi.org/10.1016/j.addr.2018.09.011));  
Carvalho et al., Trends Mol. Med. (doi:10.1016/j.molmed.2020.05.002).

ECMC  
2022

The 8th International Electronic  
Conference on Medicinal Chemistry  
01–30 NOVEMBER 2022 | ONLINE

# AS1411

Reached human clinical trials Phase 2

- ✘ Shown low potency ( $\mu\text{M}$ )
- ✘ Suboptimal pharmacology  
(rapid clearance from body)

✔ Proved to be safe for humans

*Bates et al., Biochim. Biophys. Acta – Gen. Subj. (doi: 10.1016/j.bbagen.2016.12.015)*

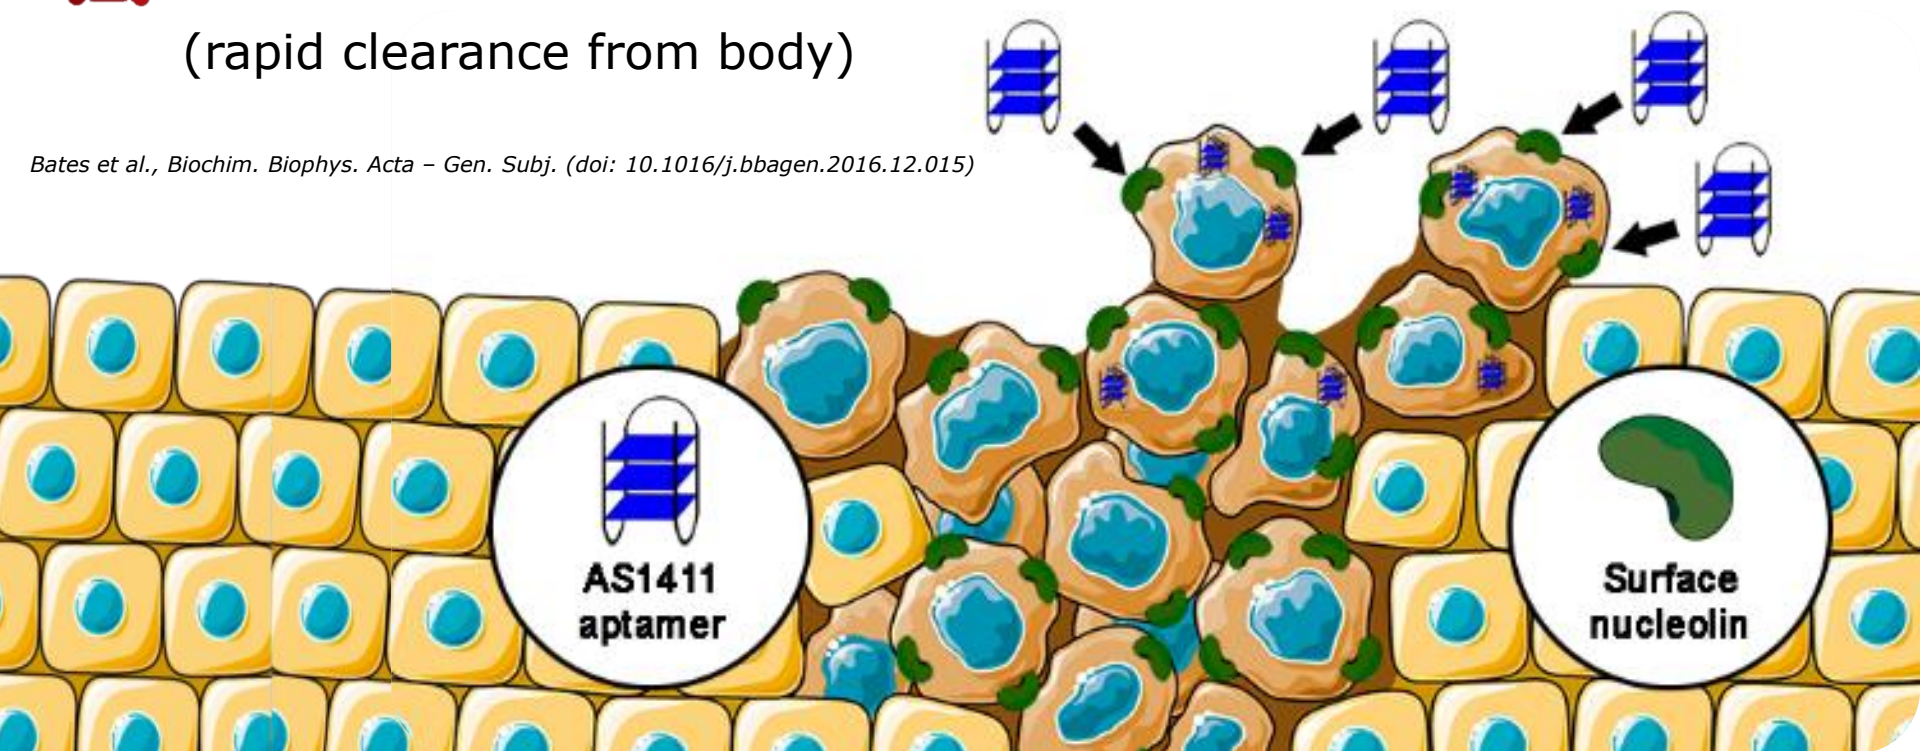

ECMC  
2022

The 8th International Electronic  
Conference on Medicinal Chemistry  
01–30 NOVEMBER 2022 | ONLINE

**AS1411**

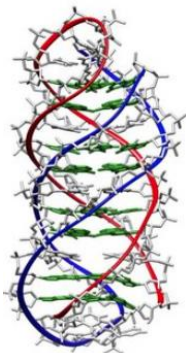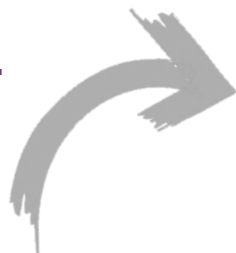

**Nucleolin**

Overexpressed on the cell membrane of cancer cells

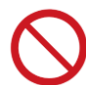

Proliferation

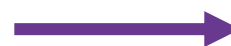

Induces cancer cell death

- ✓ Inhibition of NF- $\kappa$ B activation;
- ✓ Block of DNA replication;
- ✓ Initiation of cycle arrest and apoptosis;
- ✓ Inhibition of cellular viability by overexpression of p53;
- ✓ Downregulation of Akt1 and Bcl-2.

**AT11 G4**

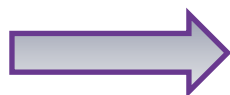

**AS1411 derivative with improved *in vitro* efficacy and nucleolin affinity**

- ✓ Cancer-selective properties of AS1411 and its derivatives may be used for conveying therapeutic compounds for HPV-positive cells.
- ✓ Synthesis of aptamer-based nanosystems as potential drug delivery system that can enhance malignant cell selectivity/accumulation, increase toxicity and efficiently deliver chemotherapeutic drugs.

Lopes-Nunes et al., Pharmaceuticals. (doi:10.3390/ph14070671)

**ECMC  
2022**

**The 8th International Electronic  
Conference on Medicinal Chemistry**  
01-30 NOVEMBER 2022 | ONLINE



# Liposomes

One of the widest used and successful platforms for drug delivery.

- ✓ Biocompatible;
- ✓ Low immunogenicity;
- ✓ Biodegradable;
- ✓ Lowered systemic toxicity of drugs;
- ✓ Prolonged drug half-life;
- ✓ Liposomes loaded with anticancer drugs (e.g., doxorubicin) are already available for the treatment of several cancers;
- ✓ Shown to increase the plasma residence time of aptamers.

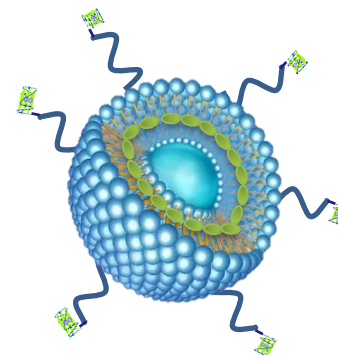

**AIM:** To produce AS1411 derivatives-functionalized liposomes to improve the selectivity of Imiquimod and C8 into oral cancer cells.

ECMC  
2022

The 8th International Electronic  
Conference on Medicinal Chemistry  
01-30 NOVEMBER 2022 | ONLINE

## Ethanol Injection Method

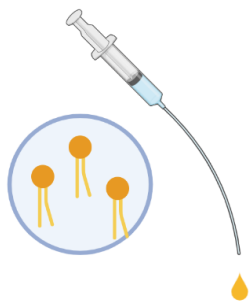

Unfavorable interaction of hydrophobic tail with water

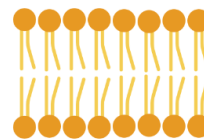

Start aggregation/  
Formation of lipidic bilayer

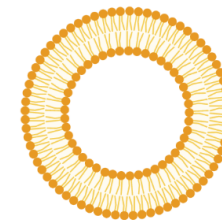

Liposome suspension in water

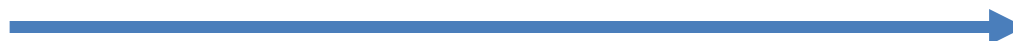

Ethanol

Water

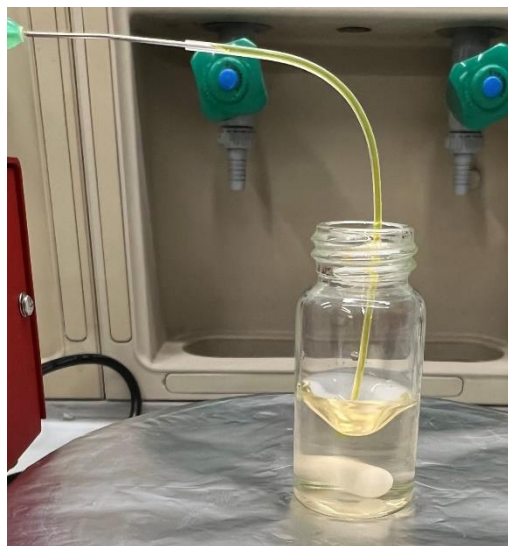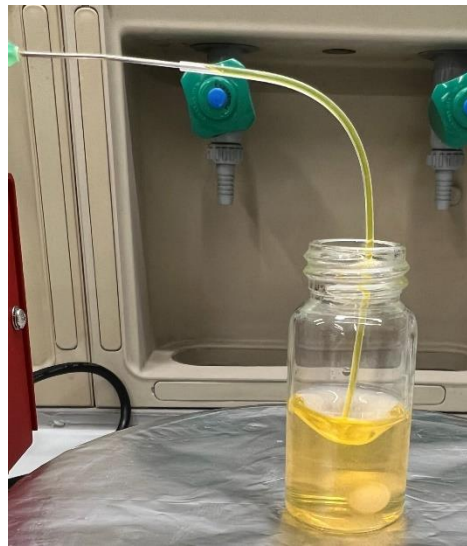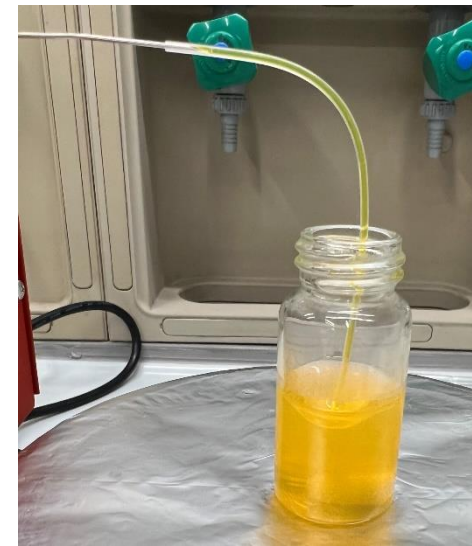

ECMC  
2022

The 8th International Electronic  
Conference on Medicinal Chemistry  
01-30 NOVEMBER 2022 | ONLINE

**Liposomes were prepared with:  
Phosphatidylcholine (PC; 130 mg/mL) + Cholesterol (CHOL; 10/12.5/15 mg/mL)**

|                                   | Z-average | PDI   | Zeta Potential |
|-----------------------------------|-----------|-------|----------------|
| Blank PC 130 CHOL 10              | 168.7     | 0.112 | -4.11          |
| PC 130 CHOL 10 + C <sub>8</sub>   | 166.9     | 0.197 | 12.4           |
| Blank PC 130 CHOL 12.5            | 160.6     | 0.163 | -5.61          |
| PC 130 CHOL 12.5 + C <sub>8</sub> | 164.3     | 0.202 | 12.2           |
| Blank PC 130 CHOL 15              | 147.8     | 0.147 | -8.59          |
| PC 130 CHOL 15 + C <sub>8</sub>   | 150.2     | 0.178 | 10.0           |

**Cholesterol influences liposomes' fluidity and drug retention**

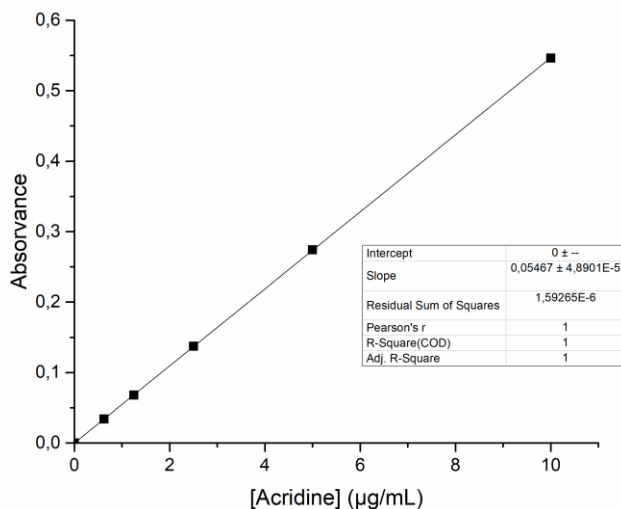

Filtrate absorbance at 495 nm

CHOL 10: 0.00058739

CHOL 12.5: 0.0024036

CHOL 15: 0.0017503

**C<sub>8</sub> Loading ~ 100%**

**ECMC  
2022**

**The 8th International Electronic  
Conference on Medicinal Chemistry**  
01-30 NOVEMBER 2022 | ONLINE

## Nucleolin is overexpressed in the UPCI-SCC-154 cells surface

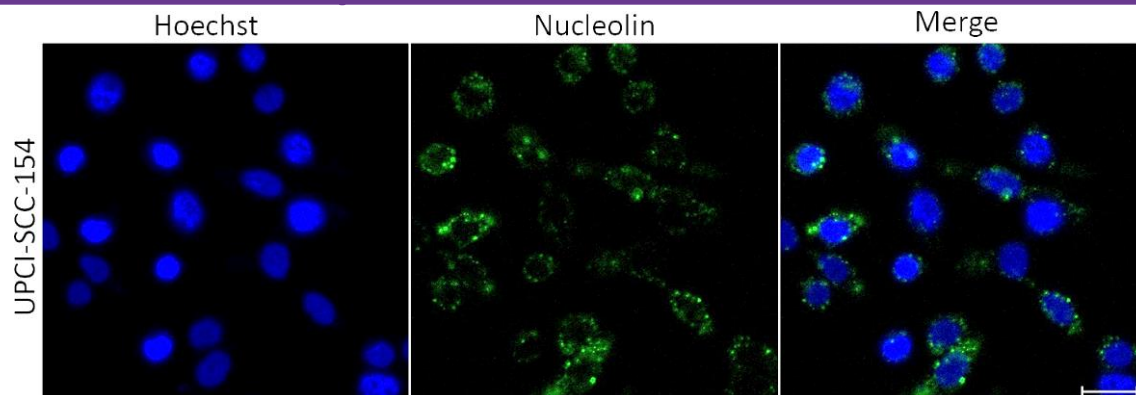

Free  $C_8$  is highly toxic in oral cancer (UPCI-SCC-154) and healthy (Het1A) cell lines

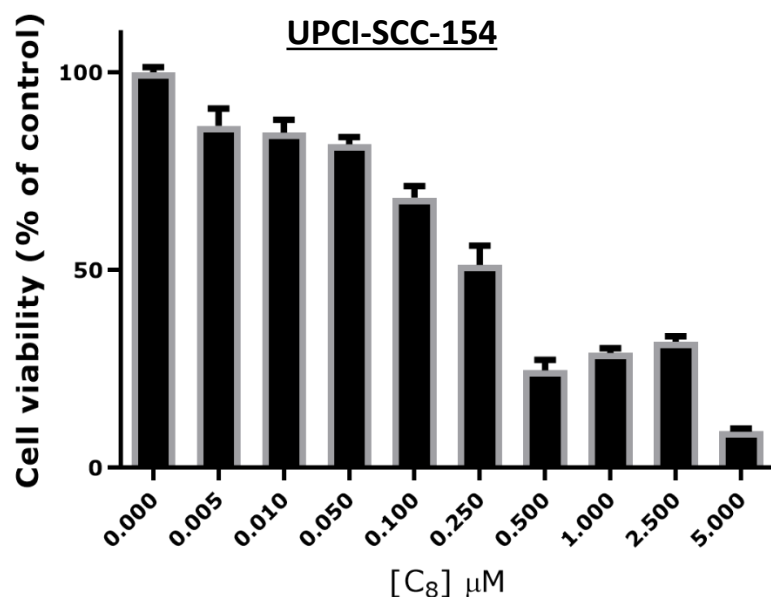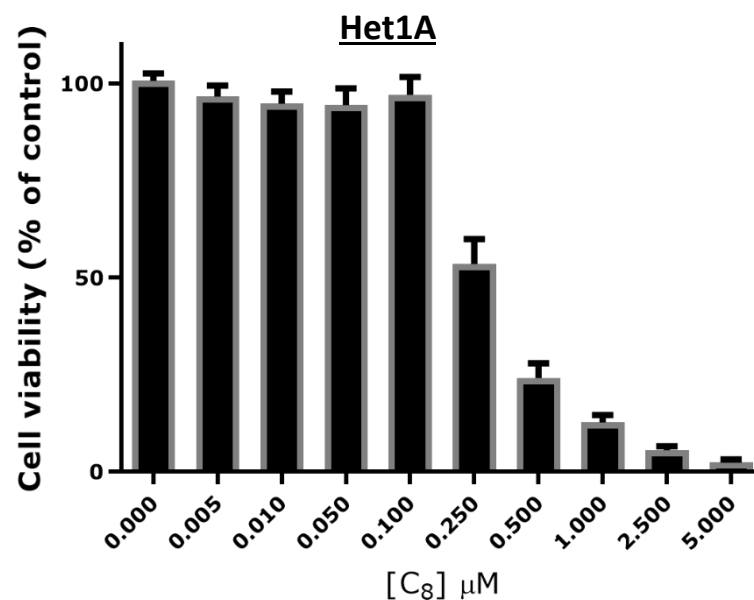



# Blank liposomes are non-toxic and C8-associated liposomes present a dose-response effect

**UPCI-SCC-154**

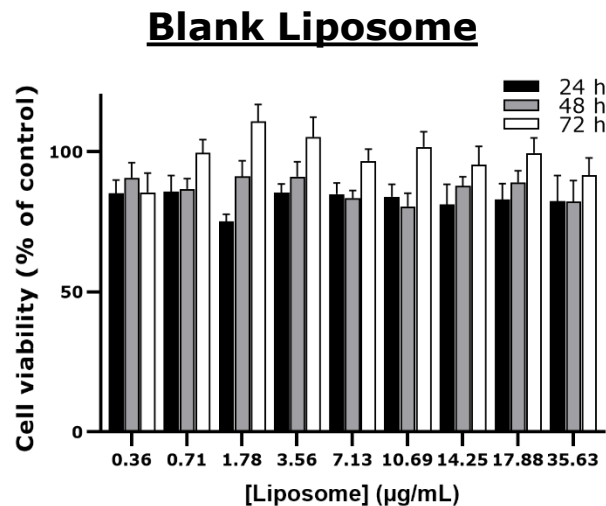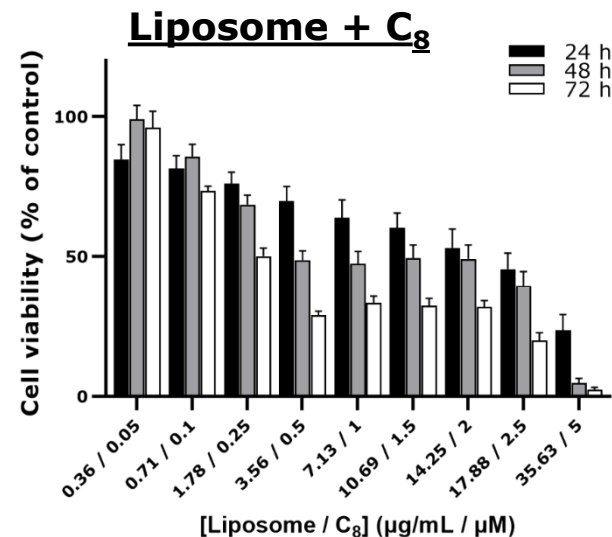

**Het1A**

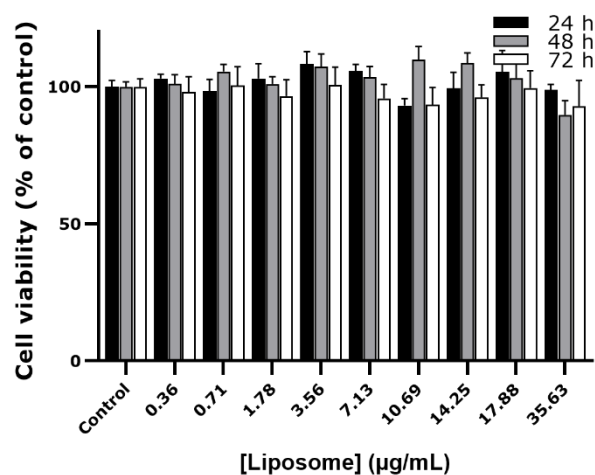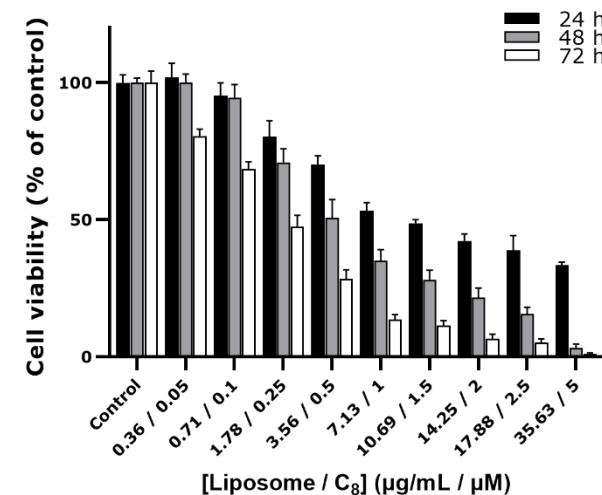

ECMC  
2022

The 8th International Electronic  
Conference on Medicinal Chemistry  
01-30 NOVEMBER 2022 | ONLINE

# Liposomes were successfully functionalized with AT11-TEG-Cholesteryl Cy5

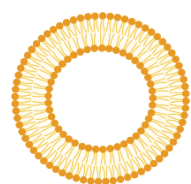

Liposome

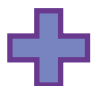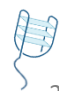

AT11-TEG-Cholesteryl Cy5

20 min incubation at different temperatures

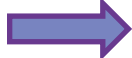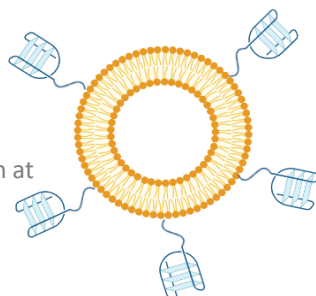

AT11-TEG-Cholesteryl Cy5 tagged liposome

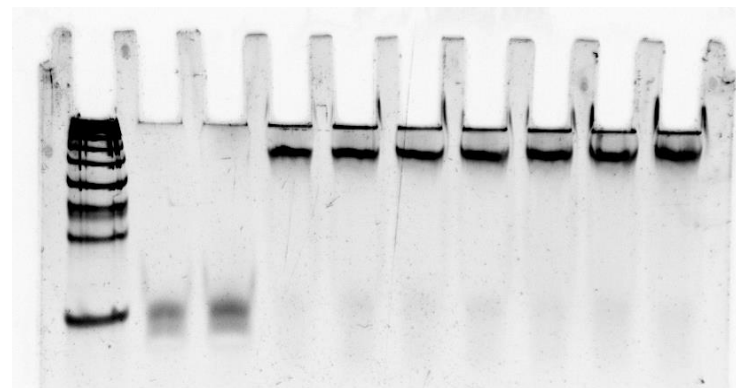

1 -25 bp Marker; 2- AT11-TEG-Cholesteryl Cy5; 3- AT11-TEG-Cholesteryl Cy5 55 °C 20 min; Liposomes + AT11-TEG-Cholesteryl Cy5 incubated for 20 min at different temperatures: 4- RT; 5- 30 °C; 6- 35 °C; 7- 40 °C; 8- 45 °C; 9- 50 °C; 10- 55 °C.

## Confocal Microscopy

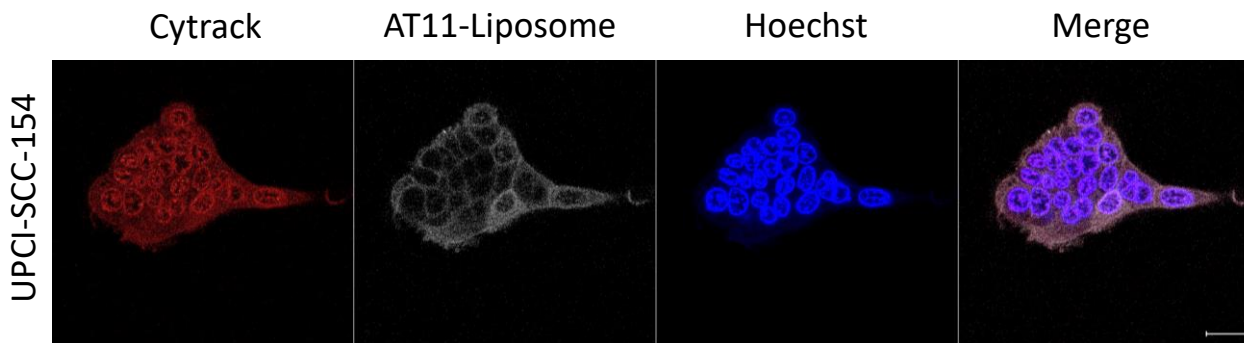

AT11-Liposomes are efficiently internalized by UPCI-SCC-154 cells

ECMC  
2022

The 8th International Electronic  
Conference on Medicinal Chemistry  
01-30 NOVEMBER 2022 | ONLINE

## Conclusions

Liposomes with hydrodynamic diameters of 148-168 nm were obtained and C8 was efficiently associated

After treating with C<sub>8</sub>-associated liposomes, both cell lines showed a dose-response effect.

AT11-liposomes can internalize cells and we expect that they are able to improve C<sub>8</sub>-associated liposomes selectivity.

**Overall, these findings suggest that the tested liposomes are promising drug carriers for oral cancer therapy.**

## Acknowledgments

- This work was supported by the project ref. CENTRO-01-0145-FEDER-181235, PAPILOMA - Vaginal gel for topical application in precancerous lesions caused by the Human Papilloma Virus;
- J. Lopes-Nunes acknowledges the doctoral fellowship grant from the FCT—Foundation for Science and Technology ref. 2020.05329.BD.

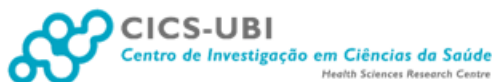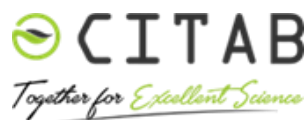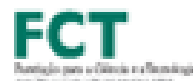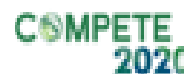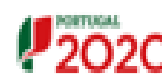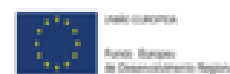

**ECMC**  
**2022**

**The 8th International Electronic  
Conference on Medicinal Chemistry**

**01-30 NOVEMBER 2022 | ONLINE**
